1 **Title**

2 A single Ho-induced double-strand break at the *MAT* locus is lethal in *Candida glabrata*

3

4 **Short title**

5 Ho-induced DSB at *MAT* is lethal in *C. glabrata*

6

7 **Authors**

8 Laetitia Maroc<sup>1</sup>, Youfang Zhou-Li<sup>1</sup>, Stéphanie Boisnard<sup>2</sup>, Cécile Fairhead<sup>1\*</sup>

9

10 **Affiliations**

11 <sup>1</sup>Université Paris-Saclay, INRAE, CNRS, AgroParisTech, GQE - Le Moulon, 91190, Gif-sur-  
12 Yvette, France.

13

14 <sup>2</sup>Université Paris-Saclay, CEA, CNRS, Institute for Integrative Biology of the Cell (I2BC),  
15 91198, Gif-sur-Yvette, France.

16

17 \*Corresponding author: [cecile.fairhead@universite-paris-saclay.fr](mailto:cecile.fairhead@universite-paris-saclay.fr)

18

19 **Keywords**

20 Mating-type switching; Ho; Homologous recombination; yeast; CRISPR-Cas9

21

22 **Abstract**

23 Mating-type switching is a complex mechanism that promotes sexual reproduction in  
24 Ascomycotina. In the model species *Saccharomyces cerevisiae*, mating-type switching is  
25 initiated by the Ho endonuclease that performs a site-specific double-strand break (DSB) at  
26 *MAT*, repaired by homologous recombination (HR) using one of the two silent mating type  
27 cassettes, *HMLalpha* and *HMRa*. The reasons why all the elements of the mating-type switching  
28 system have been conserved in some Ascomycotina, that do not show a sexual cycle nor mating-  
29 type switching, remain unknown. To gain insight on this phenomenon, we used the

30 opportunistic pathogenic yeast *Candida glabrata*, phylogenetically close to *S. cerevisiae*, and  
31 for which no spontaneous and efficient mating-type switching has been observed. We have  
32 previously shown that expression of *S. cerevisiae*'s *HO* gene triggers mating-type switching in  
33 *C. glabrata*, but this leads to massive cell death. In addition, we unexpectedly found, that not  
34 only *MAT* but also *HML* was cut in this species, suggesting the formation of multiple  
35 chromosomal DSBs upon *HO* induction.

36 We now report that *HMR* is also cut by *S. cerevisiae*'s Ho in wild-type strains of *C.*  
37 *glabrata*. To understand the link between mating-type switching and cell death in *C. glabrata*,  
38 we constructed strains mutated precisely at the Ho recognition sites. By mimicking *S.*  
39 *cerevisiae*'s situation, in which *HML* and *HMR* are protected from the cut, we unexpectedly  
40 find that one DSB at *MAT* is sufficient to induce cell death. We demonstrate that mating-type  
41 switching in *C. glabrata* can be triggered using CRISPR-Cas9, without high lethality. We also  
42 show that switching is Rad51-dependent, as in *S. cerevisiae* but that donor preference is not  
43 conserved in *C. glabrata*. Altogether, these results suggest that a DSB at *MAT* can be repaired  
44 by HR in *C. glabrata*, but that it is prevented by *S. cerevisiae*'s Ho.

45

#### 46 **Author summary**

47 Mating-type switching is one of the strategies developed by fungi to promote crossing,  
48 sexual reproduction and propagation. This mechanism enables one haploid cell to give rise to a  
49 cell of the opposite mating-type so that they can mate together. It has been extensively studied  
50 in the model yeast *S. cerevisiae* in which it relies on a programmed double-strand break  
51 performed by the Ho endonuclease at the *MAT* locus which encodes the key regulators of sexual  
52 identity. Little is known about why the mating-type switching components have been conserved  
53 in species like *C. glabrata*, in which neither sexual reproduction nor mating-type switching is  
54 observed. We have previously shown that mating-type switching can be triggered, in *C.*  
55 *glabrata*, by expression of the *HO* gene from *S. cerevisiae* but this leads to massive cell death.

56 We report here evidence toward a degeneration of the mating-type switching system in *C.*  
57 *glabrata*. We demonstrate that the DSB at *MAT* is only lethal when the Ho endonuclease  
58 performs the break, a situation unique to *C. glabrata*. Finally, we show that mating-type  
59 switching in *C. glabrata* can be triggered by CRISPR-Cas9 and without any high lethality.

60

## 61 **Introduction**

62

63 In eukaryotes, sexual reproduction is a nearly ubiquitous feature and implies  
64 fundamental conserved processes such as gamete fusion, zygote formation and meiosis (1).  
65 Sexual reproduction leads to genetic recombination between organisms and thus enables them  
66 to purge their genomes from deleterious mutations, as well as to increase their genetic diversity.  
67 It is in the fungal kingdom that the greatest diversity of sexual reproduction is found (1).  
68 Particularly, sexual reproduction in fungal human pathogens exhibits a considerable plasticity  
69 between species (2) (3). While many were thought to be asexual, several atypical sexual or  
70 parasexual cycles have been discovered. It has been shown that the yeast *Candida albicans* can  
71 perform a parasexual cycle by mating of two diploid cells, forming a tetraploid one, that can  
72 undergo chromosome loss (4). The more distant filamentous opportunistic pathogen,  
73 *Aspergillus fumigatus* exhibits a sexual cycle but only mates after spending 6-12 months in the  
74 dark (5). Altogether, this suggests that, in most fungi, performing genetic exchange is capital,  
75 even in well-adapted human pathogens.

76 In fungi, sexual reproduction can occur through three mechanisms (1): heterothallism  
77 (requiring two compatible partners for mating to occur), homothallism (self-fertility), and  
78 pseudo-homothallism (where a single individual can go through a complete sexual cycle but  
79 mating only occurs between two compatible partners). Pseudo-homothallism has mainly been  
80 described in ascomycete yeasts and occurs through a programmed differentiation process called

81 mating-type switching (6). This mechanism enables one haploid cell to give rise to a cell of the  
82 opposite mating-type so that they can mate together. It implies a genomic DNA rearrangement  
83 of the MATing-type locus (*MAT*, encoding the key regulators of sexual identity) and species  
84 have evolved very different molecular pathways for the same aim. In the fission yeast  
85 *Schizosacharomyces pombe*, an imprint at *mat1* is introduced that leads to a DSB during DNA  
86 replication (7,8). Repair occurs with one of the two silent copies of *mat1*, *mat2* and *mat3*. In the  
87 ascomycete *Kluyveromyces lactis*, mating-type switching involves a DSB at *MAT* but it is  
88 performed by two specific nucleases depending on the mating-type of the cell (9). Mating-type  
89 switching has been extensively described particularly in the model yeast *S. cerevisiae* and has  
90 notably allowed a better understanding of cell identity, DSB repair and silencing mechanisms  
91 (10).

92 In *S. cerevisiae*, haploid cells can be of either mating-type, *MAT* $\alpha$  or *MAT* $a$ , which  
93 encodes “alpha” or “a” information, respectively, at the Y sequence of the *MAT* locus (11).  
94 Mating-type switching relies on a programmed DSB at the *MAT* locus performed by the Ho  
95 endonuclease at its 24-bp recognition site. DSBs are highly toxic DNA lesions, and thus have  
96 to be efficiently repaired to ensure cell viability. This can be achieved through two major  
97 pathways, non-homologous end-joining (NHEJ) and homologous recombination (HR) in the  
98 presence of a repair template. The DSB at *MAT* is repaired ~90% of the time by HR (10),  
99 probably because of efficient resection of the DSB that has been shown to prevent NHEJ (12).  
100 The Ho cut at the *MAT* locus generates 4 bp, 3'-overhanging ends and its repair implies the  
101 following steps. The DSB ends are processed by several 5' to 3' exonucleases to create long 3'-  
102 ended tails (13). Single-strand tails are then converted to Rad51-coated nucleoprotein filaments,  
103 which search for homology and promote homologous template invasion (10). Once the  
104 homologous donor is found, the *MAT* locus is repaired by gene conversion. The homologous  
105 donor is one of the two silent loci located on the same chromosome as *MAT*: *HML* carrying the

106 “alpha” information or *HMR* carrying the “a” information. The “alpha” or “a” sequence from  
107 *HML* or *HMR* respectively, replaces the original Y *MAT* sequence whereas *HML* and *HMR*  
108 remain unchanged. Despite the fact that *HML* and *HMR* contain the Ho recognition site, both  
109 are resistant to Ho cleavage, being located in heterochromatic regions (14). In *S. cerevisiae*, a  
110 "donor preference" mechanism ensures an efficient mating-type switching at *MAT* by  
111 promoting the use of the silent locus from the opposite mating-type (*MAT<sub>a</sub>* is preferentially  
112 repaired by *HML* and *MAT<sub>alpha</sub>* by *HMR*). This donor preference depends on both the “a” or  
113 “alpha” information at the *MAT* locus and the presence of a specific sequence, the  
114 recombination enhancer (RE), located between *HML* and *MAT* (15).

115 *C. glabrata* is an opportunistic pathogenic yeast, phylogenetically close to *S. cerevisiae*  
116 (16). Its genome has retained the three-locus system, with homologs of *HML*, *MAT<sub>a</sub>/alpha*, and  
117 *HMR*, called Mating-Type Like (*MTL*) loci (17). The three loci display a structure comparable  
118 to *S. cerevisiae*'s, the main difference being that *HMR* is located on a different chromosome  
119 from *HML* and *MAT* (17). Despite these similarities, added to the fact that both *MAT<sub>a</sub>* and  
120 *MAT<sub>alpha</sub>* cells are isolated and that they maintain mating-type identity (17) (18) (19), *C.*  
121 *glabrata* is unable to switch mating-type spontaneously at an efficient level, even though rare  
122 signs of mating-type switching are observed in culture (20) and in populations (21). We have  
123 previously shown that the expression of the *HO* gene from *S. cerevisiae* can trigger mating-type  
124 switching in *C. glabrata*, and that over 99 % of *C. glabrata* cells are unable to survive to the  
125 expression of Ho (22). Conversely, we did not observe mating-type switching after the  
126 expression of the *HO* gene from *C. glabrata* in *S. cerevisiae*. By analysing surviving colonies  
127 of *C. glabrata* cut by *S. cerevisiae*'s Ho, we had also observed gene conversion events at the  
128 *HML* locus, revealing that, contrary to *S. cerevisiae*, *HML* is not protected from the Ho cut. We  
129 suggested that the lethality was due to multiple chromosomal DSBs, which would prevent  
130 homologous recombination with an intact template in most cells.

131           In this work, we explore the link between mating-type switching and lethality. For this  
132 purpose, we constructed a series of inconvertible (**inc**) strains, mutated precisely at the Ho  
133 recognition site, allowing us to control the number and position of DNA breaks during Ho  
134 induction, as well as to track which donor sequence is used as template. We analyze two aspects:  
135 viability, that reflects both the efficiency of the cut and the success of repair; and molecular  
136 analysis of repaired loci, in order to reveal which repair pathways were used. We now show  
137 that *HMR* is also cut by Ho in wild-type strains of *C. glabrata*. In addition, by mimicking *S.*  
138 *cerevisiae*'s situation, in which *HML* and *HMR* are protected from the cut, we unexpectedly  
139 find that one DSB at the *MAT* locus is sufficient to induce cell death. The use of the CRISPR-  
140 Cas9 technology enables us, not only to show that mating-type switching can be induced  
141 independently of the Ho protein in *C. glabrata*, but also, that it can be induced without any high  
142 lethality.

143 **Results**

144

145 *HMR* is cut by *Ho* in *C. glabrata* and the subsequent mating type switching relies on  
146 homologous recombination

147

148 As previously described, expression of *S. cerevisiae*'s *HO* gene in wild-type strains of  
149 *C. glabrata*, leads to the death of about 99.9 % of cells and we found that both *MAT* and *HML*  
150 are efficiently cut (22). We further analyzed surviving colonies of HM100 (*HMLalpha*  
151 *MATalpha HMRA*) by determining the mating-type at each *MTL* locus by PCR and we found  
152 that some present switching at *HMR*, indicative of cutting (not shown). *Ho*-induced lethality in  
153 *C. glabrata* could be due to the concomitant induction of multiple DSBs, in contrast to the  
154 situation in *S. cerevisiae* where *HML* and *HMR* are protected from the cut, as we hypothesized  
155 in our previous work (22).

156 In order to identify the repair pathway involved in mating-type switching, we inactivated  
157 *RAD51* (CAGL0I05544g) in strain HM100 (Table 1).

158

159 **Table 1.** Strains used in this work.

160

| <b><i>C. glabrata</i> strains with wild-type Ho sites</b>                             |               |                                                               |                  |
|---------------------------------------------------------------------------------------|---------------|---------------------------------------------------------------|------------------|
| <b>Strains</b>                                                                        | <b>Parent</b> | <b>Genotype</b>                                               | <b>Reference</b> |
| CBS138                                                                                |               | <i>HMLalpha MATalpha HMRA</i>                                 | (23)             |
| BG2                                                                                   |               | <i>HMLalpha MATa HMRA</i>                                     | (24)             |
| BG14                                                                                  | BG2           | <i>HMalpha MATa HMRA ura3Δ::Tn903 G418<sup>R</sup></i>        | (24)             |
| BG87                                                                                  | BG14          | <i>HMLalpha MATa HMRA ura3::Neo<sup>R</sup> his3Δ</i>         | (25)             |
| HM100                                                                                 | CBS138        | <i>HMLalpha MATalpha HMRA ura3Δ::KANMX</i>                    | (17)             |
| HM100 <i>Δrad51</i>                                                                   | HM100         | <i>HMLalpha MATalpha HMRA Δrad51 ura3Δ::KANMX</i>             | This work.       |
| <b><i>C. glabrata</i> strains with mutated Ho sites</b>                               |               |                                                               |                  |
| YL01                                                                                  | HM100         | <i>HMLalpha MATalpha HMRA-inc ura3Δ::KANMX</i>                | This work.       |
| YL02                                                                                  | HM100         | <i>HMLalpha-inc MATalpha HMRA ura3Δ::KANMX</i>                | This work.       |
| YL03-MATalpha                                                                         | YL02          | <i>HMLalpha-inc MATalpha HMRA-inc ura3Δ::KANMX</i>            | This work.       |
| YL03-MATa                                                                             | YL03-MATalpha | <i>HMLalpha-inc MATa HMRA-inc ura3Δ::KANMX</i>                | This work.       |
| YL04                                                                                  | YL07          | <i>HMLalpha MATalpha-inc HMRA ura3Δ::KANMX</i>                | This work.       |
| YL05                                                                                  | YL09          | <i>HMLalpha MATa-inc HMRA-inc ura3Δ::KANMX</i>                | This work.       |
| YL07                                                                                  | YL02          | <i>HMLalpha-inc MATalpha-inc HMRA ura3Δ::KANMX</i>            | This work.       |
| YL09                                                                                  | YL01          | <i>HMLa-inc MATa-inc HMRA-inc; ura3Δ::KANMX</i>               | This work.       |
| YL10                                                                                  | YL07          | <i>HMLalpha-inc MATalpha-inc HMRalpha-inc ura3Δ::KANMX</i>    | This work.       |
| SL09                                                                                  | BG87          | <i>HMLa-inc MATa-inc HMRA-inc ura3::Neo<sup>R</sup> his3Δ</i> | This work.       |
| <b><i>C. glabrata</i> strains with mutated Ho sites and/or deletion of HML or HMR</b> |               |                                                               |                  |
| CGM460                                                                                | BG14          | <i>Δhml MATalpha HMRA ura3Δ::Tn903 G418<sup>R</sup></i>       | (18)             |
| SL01                                                                                  | BG87          | <i>HMLalpha MATa Δhmr ura3::Neo<sup>R</sup> his3Δ</i>         | This work.       |
| SL-CG8                                                                                | SL01          | <i>HMLalpha-inc MATa Δhmr ura3::Neo<sup>R</sup> his3Δ</i>     | This work.       |
| SL-CG9                                                                                | CGM460        | <i>Δhml MATa HMRalpha-inc ura3Δ::Tn903 G418<sup>R</sup></i>   | This work.       |



161

162

163 Inducing the Ho DSB in this strain leads to the same cell mortality as in wild-type (Fig 1), but

164 no mating-type switching is detected at any *MTL* locus (Table 2), confirming that switching

165 relies on homologous recombination in *C. glabrata*.

166

167

168 **Table 2. Molecular structure of *MTLs* in clones from individual p7.1 transformants**

169

| Strain                                                         | Locus screened                               | Mating-type screened by PCR on tested surviving colonies                                                                     | Mating-type screened by PCR on tested sub-clones |
|----------------------------------------------------------------|----------------------------------------------|------------------------------------------------------------------------------------------------------------------------------|--------------------------------------------------|
| HM100 $\Delta rad51$<br>( <i>HMLalpha MATalpha HMRA</i> )      | <i>HML</i> ,<br><i>MAT</i> and<br><i>HMR</i> | 39/39 pure <i>HMLalpha MATalpha HMRA</i>                                                                                     | ND                                               |
| SL-CG8<br>( <i>HMLalpha-inc MATa <math>\Delta hmr</math></i> ) | <i>MAT</i>                                   | 36/36 pure <i>MATalpha-inc</i>                                                                                               | ND                                               |
| SL-CG9<br>( $\Delta hml$ <i>MATa HMRalpha-inc</i> )            | <i>MAT</i>                                   | 36/36 pure <i>MATalpha-inc</i>                                                                                               | ND                                               |
| YL03-MATa<br>( <i>HMLalpha-inc MATa HMRA-inc</i> )             | <i>MAT</i>                                   | 25/32 pure <i>MATalpha-inc</i><br>6/32 mixed <i>MATalpha-inc/a-inc</i><br>1/32 pure <i>MATa-inc</i>                          | 24/24<br><i>MATalpha-inc</i>                     |
| YL03-MATalpha<br>( <i>HMLalpha-inc MATalpha HMRA-inc</i> )     | <i>MAT</i>                                   | 42/50 pure <i>MATalpha-inc</i><br>5/50 mixed <i>MATalpha-inc/a-inc</i><br>2/50 pure <i>MATa-inc</i><br>1/50 pure <i>MATa</i> | ND                                               |

170

171 Surviving colonies obtained on inductive medium are screened by PCR at the locus that can be cut by

172 Ho endonuclease. Some mixed colonies are sub-cloned to get the ratio of each mating-type in that kind

173 of colony. ND: Not Done.

174

175 *A single DSB at MAT is sufficient to induce cell death in C. glabrata*

176 In order to test whether lethality results from multiple Ho-induced DSBs, we mimicked the

177 situation of *S. cerevisiae* where a single recipient of the Ho-induced DSB, the *MAT* locus can

178 be repaired by the two non-cleavable donors *HML* and *HMR*. We mutated the Ho recognition

179 site of both *HML* and *HMR*, so that only the *MAT* locus can be cut by Ho (strains YL03-

180 MATalpha and YL03-MATa, Table 1). Expression of *HO* in those strains leads to a lethality

181 similar to the one obtained in wild-type strains HM100 and BG87 (Fig 1). Thus, a single Ho-

182 induced DSB at *MAT*, whatever its mating-type, is sufficient to induce massive cell death in *C.*  
183 *glabrata*.

184

185 *Reducing the duration of induction of Ho does not save cells from death*

186 We reason that continuous induction of *HO* expression on solid medium for 48 hrs could  
187 be lethal due to continuous cutting. To overcome this eventuality, we performed a Ho-induction  
188 time course experiment in which Ho is induced in liquid medium and its expression is repressed,  
189 at different time points, by plating cells on repressive medium. The survival rate can thus be  
190 calculated by the ratio of colonies obtained on repressive medium to the theoretical number of  
191 cells plated on this medium. This experiment was done on strain SL-CG9, in which only *MAT*  
192 can be cut and repaired by *HMR* ( $\Delta hml$  *MATa* *HMRalpha-inc*, Table 1), thus allowing us to  
193 prevent death issues linked to cutting at *HML* and *HMR*.

194 As shown on Figure 2A, induction of the Ho-DSB leads to a drastic drop of the survival  
195 rate with more than 98 % of cell death at T=2 hrs. The survival rate then keeps slowly decreasing  
196 up to T=19 hrs. It then rises, probably because surviving cells invade the liquid culture.  
197 Molecular analysis of surviving colonies shows that mating-type switching increases up to T=4  
198 hrs (Fig 2A). These results show that cells cannot be saved by stopping Ho induction, even at  
199 early stages of the experiment.

200

201 *Lethality is not due to toxic recombinational repair intermediates*

202 We wondered whether the fact that *HMR* is not on the same chromosome as *HML* and  
203 *MAT*, contrary to *S. cerevisiae*, could be a cause for lethal rearrangements during DSB repair  
204 at *MAT*. Alternatively, death could be a result of the degeneration of the mating-type switching  
205 mechanism, for example by invasion of both *HML* and *HMR* by the two ends of the broken  
206 *MAT* locus, leading to non-resolvable structures.

207 In order to test this, we constructed two strains in which *MAT* can be cut by Ho and can  
208 only be repaired either by *HML* or by *HMR* (SL-CG8, *HMLalpha-inc MATa Δhmr*, and SL-  
209 CG9, *Δhml MATa HMRalpha-inc*, respectively, Table 1). Expression of the *HO* gene in both  
210 strains leads a high lethality (Fig 3A), similar to the ones of the wild-type or YL03 strains. We  
211 analyzed the molecular structure of the *MAT* locus in colonies from induction plates, by PCR  
212 using primers specific of the mating-type carried by the *MTL* (“alpha” or ”a”, wt or inc, S2  
213 Table and S1 Appendix). This allows the distinction of the original *MAT* locus from the repaired  
214 locus that has become resistant to cutting. All surviving colonies tested exhibited mating-type  
215 switching, whatever the location of the repair template (*HML* in strain SL-CG8 and *HMR* in  
216 strain SL-CG9, Table 2). Thereby, the genomic localization and consequently the configuration  
217 of the repair templates in *C. glabrata* is not the cause of lethality.

#### 218 *Donor preference in C. glabrata is biased towards HML*

219 Donor preference in *S. cerevisiae* is a highly regulated mechanism which allows a  
220 productive mating-type switching by promoting the use of the donor locus of opposite mating-  
221 type to repair the DSB at *MAT* (15). In order to know whether this preference was conserved in  
222 *C. glabrata*, we performed a molecular analysis of the *MAT* locus after induction of Ho to reveal  
223 which template was used for repair in strains that carry different and inconvertible mating-types  
224 at *HML* and *HMR*, i.e. strains YL03-MATalpha and YL03-MATa (Table 1).

225 Analysis of surviving colonies from strain YL03-MATa shows that 78 % display only the  
226 alpha-inc information at *MAT*, 3 % display only the a-inc information at *MAT*, and 19 % show  
227 both alpha-inc and a-inc information in the same colony (mixed colonies) (Table 2). The latter  
228 can arise if the DSB at *MAT* happens after the first cell division so that cells can repair the DSB,  
229 independently, using either *HMLalpha-inc* or *HMRa-inc*. Such mixed colonies were sub-cloned  
230 in order to get the ratio of cells that have used *HML* or *HMR* as template but we failed to isolate  
231 *MATa-inc* sub-clones, indicating that the use of *HMR* is a very rare event (~3 %) (Table 2).

232 Similar results were obtained for strain YL03-MATalpha: 84 % of surviving colonies  
233 tested display only the *MATalpha-inc* genotype, 4 % display a pure *MATa-inc* genotype, 10 %  
234 show both alpha-inc and a-inc information at *MAT* in the same colony and 2 % remain  
235 *MATalpha* (Table 2). Thus, in contrast to *S. cerevisiae*, *HML* is preferentially used as template  
236 for repair in *C. glabrata*, whatever the mating-type at *MAT*.

237

### 238 *Protecting the MAT locus from DSB is sufficient to restore viability*

239 We then expressed *HO* in a strain in which only *MAT* is protected from the cut, while both  
240 *HML* and *HMR* can be cleaved by Ho (Strain YL04, Table 1). In this strain, cell viability  
241 drastically increases to ~20 %. Survival does not reach 100 % but is 2 000 times higher than in  
242 the wild-type isogenic strain, HM100 (P-value<0.001, Wilcoxon test) (Fig 1). This result has  
243 been confirmed with five other strains in which *MAT* and either *HML* or *HMR*, or both, are  
244 protected from the Ho-induced DSB (Strains YL05 and YL07 respectively, and strains YL10,  
245 YL09 and SL09, Table 1 and Fig 1). Thus, the high lethality induced by expression of Ho,  
246 disappears when *MAT* is protected from the cut. However, when the three *MTL* loci are  
247 protected from the Ho DSB, the survival rate never exceed 61 %. This result underlies a toxic  
248 role of *S. cerevisiae*'s Ho outside its role in lethal DSBs at *MAT*.

249

### 250 *The MAT-DSB induced lethality is specific to Ho*

251 We checked whether the *MAT* DSB-induced lethality was caused by the DSB *per se* at  
252 *MAT*. In order to test this, we induced a DSB at *MAT* by Cas9 using the CRISPR-Cas9 system  
253 from (26). This system relies on a unique *URA3* plasmid, pCGLM1, in which *CAS9* gene is  
254 inducible. This allows us to induce a DSB at *MAT* with Cas9, in the same conditions as with  
255 Ho in strains SL-CG8 and SL-CG9 (*HMLalpha-inc MATa Δhmr*, and *Δhml MATa HMRalpha-*  
256 *inc*, respectively). We used as gRNA, a sequence that targets the Ho site of the locus containing

257 Ya, so that it can only target the *MAT* locus in strains SL-CG8 and SL-CG9. Due to constraints  
258 on the design of the gRNA, the Cas9-induced DSB is shifted by 18 bp compared to the Ho-  
259 induced DSB (Fig 3B).

260 Induction on solid medium shows that 95 % of the cells are able to give rise to a colony,  
261 as shown on Figure 3A. Furthermore, the very low lethality observed corresponds to the one  
262 observed when *CAS9* is expressed alone (without any gRNA) (26). We made sure that Cas9  
263 had indeed cut the *MAT* locus by screening mating-type switching of surviving colonies by  
264 PCR. Depending of the strain, between 87 % and 100 % of the colonies tested presented “alpha-  
265 inc” information at *MAT*, even though most are mixed colonies, confirming the cut of this locus  
266 by Cas9 and induction of mating-type switching (Table 3).

267

268 **Table 3. Molecular structure of *MAT* in clones from individual pCGLM1-Ya2 transformants**

269

| Strain                                                                          | Locus screened | Mating-type screened by PCR on tested surviving colonies                                      | Mating-type screened by PCR on tested sub-clones                 |
|---------------------------------------------------------------------------------|----------------|-----------------------------------------------------------------------------------------------|------------------------------------------------------------------|
| SL-CG8<br>( <i>HMLalpha-incMAT<math>\alpha</math> <math>\Delta</math>hmr</i> )  | <i>MAT</i>     | 36/40 <i>MATalpha-inc/a</i><br>4/40 <i>MATalpha-inc</i>                                       | 40/48 <i>MATalpha-inc</i><br>8/48 <i>MAT<math>\alpha</math></i>  |
| SL-CG9<br>( <i><math>\Delta</math>hml MAT<math>\alpha</math> HMRalpha-inc</i> ) | <i>MAT</i>     | 32/45 <i>MATalpha-inc/a</i><br>7/45 <i>MATalpha-inc</i><br>6/45 <i>MAT<math>\alpha</math></i> | 38/48 <i>MATalpha-inc</i><br>10/48 <i>MAT<math>\alpha</math></i> |

270

271 Surviving colonies obtained on inductive medium are screened by PCR at the locus that can be cut by  
272 the Cas9 endonuclease. Some mixed colonies are sub-cloned to get the ratio of each mating-type in  
273 that kind of colonies.

274 We also performed a time-course experiment with Cas9 in strain SL-CG9 (Fig 2B). This shows  
275 that Cas9 induction in liquid medium only leads to a decrease of 20 % of the survival rate at 6  
276 hrs. The survival rate then rises rapidly to become stable after 8 hrs of induction. Surprisingly,  
277 contrary to what we observe in induction on plates, screening of mating-type switching at *MAT*  
278 revealed that only ~20 to 36 % of surviving colonies have switched mating-type (Fig 3B).

279         These results show that the *MAT* locus can be cut and repaired by HR without any  
280 accompanying high lethality.

281

282

283        **Discussion**

284        Mating-type switching is a highly regulated mechanism that relies on a chromosomal DSB.  
285        DSBs are a major threat for genome integrity (27). Repair of such damage is essential and can  
286        be achieved through Rad51-dependent HR which involves many steps in order to succeed:  
287        search for homology involving Rad51 and Rad52 in *S. cerevisiae*, copy on the donor locus and  
288        displacement and resolution of the double Holliday junction (28). In *S. cerevisiae*, the DSB at  
289        the *MAT* locus is repaired by HR using *HMR* or *HML* as template, depending on the original  
290        mating-type of the cell. *C. glabrata* does not switch mating types spontaneously at high  
291        frequency (20). We have previously shown that mating-type switching can be efficiently  
292        induced in this yeast by expressing the *HO* gene from *S. cerevisiae*, but that it is lethal to most  
293        cells (22). Our previous work also showed that the *HML* locus is cut in *C. glabrata*; something  
294        that never happens in wild-type strains of *S. cerevisiae* (22). In this work, we aimed at  
295        understanding the link between mating-type switching and cell death in *C. glabrata*. To this  
296        end, we constructed strains with inconvertible Ho sites (**inc**) in which mutations have been  
297        introduced precisely on the Ho site in such way that the Ho cut is prevented. We thus could  
298        examine survival to individual DSB at the different *MTL* loci as well as knowing which *MTL*  
299        has been used as template for repair.

300        We now show that *HMR* is also cut by the Ho endonuclease in *C. glabrata*, suggesting a  
301        deficiency of silencing mechanisms at this locus. This assumption is supported by previous  
302        studies that have shown that, in *C. glabrata*, *HMR* is not silenced at the transcriptional level,  
303        and that subtelomeric silencing is less robust than *S. cerevisiae*'s silencing mechanisms (29,30).  
304        In *S. cerevisiae*, the donor preference mechanism ensures an efficient mating-type switching at  
305        *MAT* by promoting the use of the template from the opposite mating-type, in repair (15). We  
306        found, in *C. glabrata*, that whatever the mating-type at *MAT*, *HML* is preferentially used as  
307        template for repair. This indicates that the donor preference from *S. cerevisiae* seems not to be



308 conserved in *C. glabrata* and that the length of the sequence homology shared between the loci,  
309 *HML*, *MAT* and *HMR* does not influence the use of the donor for repair of the *MAT* DSB. Along  
310 with the fact that the *C. glabrata* endogenous Ho protein fails to induce efficient mating-type  
311 switching (22), these results could indicate a degeneration of the mating-type switching system  
312 in *C. glabrata*. This cannot be related to the content of *C. glabrata*'s genome as it has retained  
313 all the genes known to be involved in DSB repair in *S. cerevisiae* (31). However, it is  
314 understandable that such a dangerous mechanism would be lost if it is not essential; as seems  
315 to be the case in *C. glabrata* since no sexual cycle has been described in this species.

316

317 In our previous work, we hypothesized that multiple DSBs at the *MTL* loci would be  
318 unrepairable and that this was the cause for lethality when mating-type switching is induced.  
319 To prevent additional DSBs at *HML* and *HMR* and mimic *S. cerevisiae*'s situation, in which  
320 *MAT* is the only recipient of the Ho cut, we mutated the Ho site at both *HML* and *HMR*. We are  
321 now able to demonstrate that one Ho-DSB at the *MAT* locus is sufficient to induce cell death at  
322 a similar level to wild-type cells, thus invalidating our previous hypothesis. This means that,  
323 even in the presence of two intact homologous sequences, the *MAT* locus is not able to repair  
324 the break. More surprisingly, the DSB at *MAT* is only lethal when it is performed by the Ho  
325 protein. We show that mating-type switching can be triggered by CRISPR-Cas9, thus  
326 independently of the Ho protein, in *C. glabrata*. This has been shown only recently in the model  
327 species *S. cerevisiae* (32). No lethality is observed after a Cas9-DSB at *MAT* on plates and a  
328 lethality of ~20 % is observed in liquid induction. This lethality probably corresponds to the  
329 fact that HR is less efficient in *C. glabrata* than in *S. cerevisiae* (33,34). The discrepancy in  
330 survival between solid and liquid induction experiments can be explained by the fact that  
331 surviving cells appear early enough on solid induction to give rise to a colony, leading to  
332 survival rate of 95 %. The substantial difference between liquid and solid induction resides in

333 the percentage of switched colonies obtained after Cas9 induction. On solid medium, nearly all  
334 surviving colonies tested on induction plates showed mating-type switching, suggesting that  
335 the Cas9 cut at the *MAT* locus is highly efficient. In addition, this is true whatever the template  
336 available for repair, *HML* or *HMR*. It thus demonstrates that both *HML* and *HMR* are accessible  
337 repair templates for *MAT*, and that location of *HMR* on another chromosome than *MAT* does  
338 not prevent its use as template, nor does it cause lethality. It also shows that the HR system in  
339 *C. glabrata* is efficient. On the contrary, only ~30 % of surviving colonies from Cas9 induction  
340 time-course experiment showed a switch at *MAT*, even at 38 hrs of induction. This can be  
341 explained by a growth competition in liquid medium between Cas9- and Cas9+ cells. It is  
342 probable that cells that have switched mating-types keep a functional plasmid that expresses  
343 Cas9 continuously since once they have switched, they become resistant to further cutting. The  
344 continuous expression of Cas9 could slow down growth of such cells whereas cells that have  
345 mutated the plasmid before switching their mating-type at *MAT* grow faster. Thus, cells that  
346 have mutated the *CAS9* gene (or its promoter in such way that *CAS9* is not expressed anymore)  
347 invade the liquid culture so that *MAT*-switched cells will be diluted and less represented on  
348 repressive plates.

349 Unless the difference in the lethality between the expression of Cas9 and of Ho is due to  
350 the 18 bp shift in cutting, which seems highly unlikely, these results suggest that the Ho protein  
351 prevents DSB repair specifically at the *MAT* locus, in such a way that 99.9 % of cells die. This  
352 high lethality is specific to *C. glabrata* as expression of *S. cerevisiae*'s *HO* gene, exactly in the  
353 same conditions as in *C. glabrata*, is not lethal in the close species *Nakaseomyces delphensis*  
354 (unpublished data). It is surprising that *S. cerevisiae*'s Ho could have a deleterious effect in a  
355 locus-specific manner. As in all three-loci based mating-type switching systems, the three *MTL*  
356 loci of *C. glabrata* share identical sequences and only differ by the mating-type carrying and/or  
357 their location in the genome (35). We know that mating-type borne by any of the *MAT* does not

358 influence lethality as both HM100 and BG87 die at 99.99 % (Fig 1). Thus, only the location of  
359 the *MAT* locus could explain the specificity of lethality induced by Ho. The *MAT* locus is  
360 located in a central region on chromosome B whereas *HML* and *HMR* are positioned in  
361 subtelomeric regions on chromosome B and E, respectively (36). Thus, the Ho specificity for  
362 *MAT* could only be achieved either through the structure of the chromatin or through the  
363 flanking sequences of the *MAT* locus. How exactly does the *S. cerevisiae*'s Ho protein act to  
364 induce a high lethality remains unknown but one hypothesis is that Ho prevents DSB repair by  
365 getting stuck at *MAT*, after performing the DSB, preventing recruitment of recombination  
366 proteins and thus repair of the locus.

367

368 Finally, we would like to discuss the toxic role of *S. cerevisiae*'s Ho, in *C. glabrata*,  
369 outside its role in lethal DSB at *MAT*. Several hypotheses may be envisaged. In *C. glabrata*, *S.*  
370 *cerevisiae*'s Ho endonuclease could cut another site in the genome, outside the three *MTL* loci  
371 that would be lethal in a haploid genome. Even if, by a bioinformatics analysis, we could not  
372 find any additional Ho sites outside the *MTL* loci, we cannot exclude the existence of a more  
373 degenerate site. An alternative hypothesis is that the Ho protein binds the mutated Ho sites (**inc**)  
374 and gets stuck there. In that way, it could, for example, physically block replication forks and  
375 thus prevent DNA replication and cell division. We favor the second hypothesis as in a strain  
376 in which *MAT* is deleted and both *HML* and *HMR* are inconvertible, survival rate reaches ~83  
377 % (unpublished data). Performing a ChIP-PCR on the Ho protein to examine its binding on the  
378 three *MTL* loci would allow us to better explore this aspect.

379

380

## 381 **Materials and methods**

### 382 **Strain, cultures and transformation**

383 *C. glabrata* strains used in this study are listed in Table 1. Strains are grown in broth or on  
384 plates at 28°C in YDP (non-selective, 1% Yeast Extract, 1% Peptone, 2% glucose), in Synthetic  
385 Complete medium lacking uracil (SC-Ura, 0.34 % Yeast Nitrogen Base without amino acids,  
386 0.7 % ammonium sulfate, 2 % glucose, supplemented with adenine and all amino acids except  
387 uracil) or in Synthetic Complete medium lacking uracil, methionine, and cysteine (induction  
388 conditions for the *MET3* promoter, SC-Ind, 0.34 % Yeast Nitrogen Base without amino acids,  
389 0.7 % ammonium sulfate, 2 % glucose, supplemented with adenine and all amino acids except  
390 methionine and cysteine). For selection of transformants of the Ho plasmid or Cas9 plasmid  
391 and maintenance in repressive conditions for the *MET3* promoter, strains are grown in SC-Ind  
392 supplemented with 2 mM each of methionine and cysteine (SC-rep) and in YPD supplemented  
393 with 2 mM each of methionine and cysteine (YDP-Rep) when repression but no selection is  
394 needed. For SC-Rep, medium is buffered by 10 mL of Na<sub>2</sub>HPO<sub>4</sub> 0.05 M and NaH<sub>2</sub>PO<sub>4</sub> 0.95 M  
395 per liter. For *URA3* counter-selection marker, yeast strains are grown on 5-FOA medium (SC-  
396 Ura supplemented with 1 g/L of 5-fluoroorotic acid (5-FOA) and 50 mg/L of uracil).

397 Transformation is done according to the “one-step” lithium acetate transformation protocol  
398 from (36).

399

### 400 **Induction of mating-type switching by Ho**

401 The *HO* gene from *S. cerevisiae* is cloned into the pCU-MET3 plasmid under the *MET3*  
402 promoter (p7.1, S1 Table) (37) and protocol for solid induction is detailed in (22). For time-  
403 course of induction in liquid medium, transformants are grown overnight in liquid SC-Rep  
404 medium, counted, washed and resuspended in sterile water at 4.10<sup>7</sup> cells/mL. 100 µL is used to  
405 inoculate 40 mL of liquid SC-Ind medium and the culture is placed at 28°C with agitation. For

406 each time point, a sample of the culture is counted under the microscope, diluted and plated on  
407 SC-Rep plates.

408

### 409 **Induction of mating-type switching by CRISPR-Cas9.**

410 We used the inducible CRISPR-Cas9 system for *C. glabrata* from (26) through plasmid  
411 pCGLM1. We cloned into pCGLM1 a sequence corresponding to a guide RNA (gRNA)  
412 targeting the Ya sequence (S2 Table), giving rise to plasmid pCGLM1-Ya2.

413 Induction of Cas9 DSB was then performed as for induction of the *S. cerevisiae*'s *HO* gene  
414 done with p7.1 (see above).

415

### 416 **Construction of strains**

417 We mutated the Ho sites in the region known to be essential for Ho cutting in *S. cerevisiae*  
418 (38), as shown on Appendix 2, yielding loci *HML-inc* *MAT-inc* and *HMR-inc*. Modification of  
419 *HML*, *MAT*, or *HMR* loci was realized either by marker selection (pop-in/pop-out) (39) or by  
420 mating-type switching upon *HO* gene expression or by use of CRISPR/Cas9. The three methods  
421 are detailed below. Primers and plasmids are listed in S2 and S1 Tables, respectively. Method  
422 used to construct each strain is listed in S3 Table.

423

#### 424 *Construction of PCR fragments and plasmids for pop-in*

425 In order to integrate the *URA3* marker at the targeted locus (pop-in), we amplify the *URA3*  
426 gene from *S. cerevisiae* under its own promoter by PCR using primers Sc-URA3-F and Sc-  
427 URA3-R and, YEp352 as template. The PCR fragment is cloned into the *EcoRV*-digested  
428 pBlueScript. Such cloning gives rise to pURA (S1 Table).

429 To direct integration of the *URA3* marker at the targeted locus, here the *MTL* loci *HML*, *MAT*  
430 or *HMR*, the 5' and 3' flanking regions are added to the *URA3* marker in multiple steps.

431 First, the Z sequence, shared by the three *MTL* loci, was amplified by PCR using primers 68/70  
432 and HM100 strain DNA as template (S2 Table). Primers 68 and 70 contain *Bam*HI and *Eco*RI  
433 restriction sites, respectively, to allow cloning of the Z PCR fragment upstream of the *URA3*  
434 marker into pURA, giving rise to pZUA (S1 Table).

435 Second, Ya and Yalpha sequences were amplified on strain HM100 by PCR, using primers  
436 73/72 and 74/69 respectively (S2 Table). Primers 73 and 72 contain *Hind*III and *Sal*I restriction  
437 sites, respectively, in order to clone the Ya PCR fragment downstream of the *URA3* marker into  
438 pZU, giving rise to pZUA (S1 Table). The *Sal*I restriction site was added to primer 69 and no  
439 restriction site was added to primer 74 as the Yalpha PCR fragment already contains the *Hind*III  
440 restriction site 38 bp from the 5' of the fragment. Thus, the Yalpha PCR fragment, digested by  
441 both *Sal*I and *Hind*III, was cloned downstream of the *URA3* marker into pZU to give rise to  
442 pZUAlpha (S1 Table).

443 Amplification by PCR, using universal primers M13F/M13R, on the both pZUA and  
444 pZUAlpha plasmids, leads to ZUA and ZUAlpha fragments, respectively. These fragments  
445 have been used for targeting *HML*, *MAT* or *HMR* loci (S1 Table) and Ura<sup>+</sup> transformants were  
446 selected on SC-Ura. Correct integration of the fragment was checked by PCR.

447

#### 448 *Construction of plasmids and PCR fragments for pop-out*

449 The *URA3* marker is removed (pop-out) from the target locus by homologous  
450 recombination with a DNA fragment derived from the upstream and downstream sequences of  
451 that locus (S3 Table).

452 In order to replace the wild-type Ho site in the different *MTL* loci, by the inconvertible-  
453 mutated Ho site, we constructed two plasmids; pZA-inc and pZalpha-inc (S1 Table). The pZA-  
454 inc plasmid (without *URA3* gene) results from double digestion of pZUA by *Eco*RI and *Hind*III  
455 and ligation after Klenow fill-in. The pZAlpha-inc (without the *URA3* gene) plasmid was

456 constructed by cloning the *Bam*HI/*Eco*RI-digested Z fragment and the *Eco*RI/*Sal*I-digested  
457 Yalpha fragment into the pBlueScript double digested by *Bam*HI and *Sal*I. Amplification by  
458 PCR using primers M13F/M13R, from both pZA-inc and pZAlpha-inc plasmids, lead to the  
459 ZA-inc and ZAlpha-inc fragments that have been used for pop-out. The wild-type and  
460 inconvertible Ho site sequences comparison is presented on Fig. S1. In the case of the fragment  
461 used for pop-out of *URA3* for the deletion of *HMR* in strain BG87, construction was done by  
462 amplification of upstream and downstream sequences (500 bp each) of *HMR* on strain BG87,  
463 using primers Up-HMR-F/Up-HMR-R and Down-HMR-F/ Down-HMR-R, respectively (S2  
464 Table). Primer Up HMR-R contains 40 bp of homology to the 5' end of the downstream PCR  
465 fragment. These two fragments were then combined by fusion PCR using primers Up-HMR-F  
466 and Down-HMR-R, giving rise to the  $\Delta$ HMR fragment (strain SL01, S3 Table). As shown in  
467 S3 Table, other fragments for pop-out experiments were obtained by direct PCR on genomic  
468 DNA.

469 About 1  $\mu$ g of each pop-out fragment was used to transform Ura<sup>+</sup> strains, which were then  
470 plated onto YPD, grown for 24 hrs and replica-plated onto 5-FOA plates. Resulting 5-FOA<sup>R</sup>  
471 colonies were checked by PCR for correct removal of the *URA3* marker, and the locus has been  
472 sequenced in the final strains.

#### 473 474 *Strains obtained by mating-type switching*

475 When possible, we took advantage of the efficient mating-type switching induced by  
476 expression of *HO* to transpose the **inc**-Ho site mutation from a sexual locus to another, instead  
477 of doing pop-in/pop-out transformations as above. For example, an *HMLalpha-inc* locus can  
478 easily be used as template, during gene conversion, to repair either *MAT* wt or *HMR* wt. In  
479 addition, extra-chromosomal copies of either *MATa-inc* or *MATalpha-inc* were also used as  
480 templates for mating-type switching of *MTL* loci, in order to insert **inc**-Ho sites. These copies  
481 were introduced in the p7.1 plasmid, as follows. Plasmid p7.1 (22) was digested by *Kpn*I, and

482 *MATa-inc* and *MATalpha-inc* sequences were amplified by PCR using primers Up-Rec-MAT-  
483 F/ Down-Rec-MAT-R on strains YL07 and YL09, respectively (Table 1 and S2). Both primers  
484 share, respectively, 40 bp of homology to the ends of the *KpnI*-digested plasmid. This allows  
485 PCR fragment cloning in p7.1, at the *KpnI* restriction site, by homologous recombination in *E.*  
486 *coli* (40). Correct assembly was confirmed by both analytic colony PCR and restriction digests.

487 Expression of Ho is induced in strains that are targeted for modification, either from the  
488 p7.1 plasmid, when a genomic *MTL* locus is used as template, or from p7.1-derived plasmids  
489 that contain a copy of *MATa-inc* or *MATalpha-inc*. Final loci are checked by PCR and  
490 sequencing.

491

#### 492 Construction of the *Δrad51* mutant using CRISPR-Cas9

493 The *Δrad51* mutant of strain HM100 was constructed with the CRISPR-Cas9 system on  
494 plasmid pJH-2972 (kind donation from J. Haber,  
495 <https://protocolexchange.researchsquare.com/article/nprot-5791/v1>). We cloned a sequence  
496 corresponding to a guide RNA (gRNA) targeting the *RAD51* gene into plasmid pJH-2972 (S2  
497 Table), giving rise to plasmid pJH-RAD51.

498 We amplified upstream and downstream sequences (500 bp each) of *RAD51* CDS on strain  
499 HM100 by PCR using primers Up-Rad51-F/Up-Rad51-R and Down-Rad51-F/Down-Rad51-  
500 R, respectively (S2 Table). Primer Up-Rad51-R contains 40 bp of homology to the 5' end of the  
501 downstream PCR fragment. These two fragments are then combined by fusion PCR using  
502 primers Up-Rad51-F and Down-Rad51-R, giving rise to the *Δrad51* fragment.

503 The strain was then co-transformed with both 1 μg of pJH-RAD51 and 1 μg of *Δrad51*  
504 fragment. Ura<sup>+</sup> transformants were then selected on SC-Ura and checked for deletion at the  
505 *RAD51* locus by PCR. Deletion was confirmed by sequencing the *RAD51* locus and by Southern  
506 blot analysis (S3 Appendix).



507

## 508 **Cell viability estimation**

509 Different dilutions of cultures, containing between 200 to  $10^6$  cells, are spread on both  
510 inductive and repressive media. When the survival rate is over 20 %, cell viability is determined  
511 directly as the ratio of the number of colonies counted on inductive medium to the number of  
512 colonies counted on repressive medium, for the same dilution. When the survival rate is under  
513 1 %, colonies are confluent on repressive medium at the same dilution where several colonies  
514 can be observed on induction medium. Thus, survival rate is measured by first comparing the  
515 number of colony-forming units (CFU) on inductive medium with the theoretical number of  
516 cells plated, as estimated by counting on a Thoma counting chamber. This is then corrected by  
517 the ratio of CFU to the number of cells counted, estimated by plating 200 cells on repressive  
518 medium. All the values were obtained from at least four independent transformants. Colonies  
519 number from a minimum of 18 to a maximum 494 was counted on plates.

520

## 521 **Determining the genotype at *MTL* loci.**

522 The genotype of surviving colonies at each *MTL* locus is determined by PCR using specific  
523 primers: the forward primer is located upstream of the locus (ensuring specificity of the locus  
524 screened; *HML*, *MAT* or *HMR*) and a reverse primer located precisely on the Ho site (ensuring  
525 specificity of the information carried by the locus; alpha or a and wt or **inc**) (S2 Table, S1  
526 Appendix). We checked that the mutated Ho-sites, “alpha-**inc**” and “a-**inc**” are not cut since  
527 we never observe switching at those loci (not shown).

528

529 **Acknowledgements**

530

531 We thank members of our lab and the iGénolevures network ((IRN from the CNRS N°0814)

532 for stimulating discussions, Gilles Fischer, Fabienne Malagnac and Pierre Grognet for critical

533 reading.

## 534 **Bibliography**

- 535 1. Ni M, Feretzaki M, Sun S, Wang X, Heitman J. Sex in fungi. *Annu Rev Genet.* 2011;45:405-30.
- 536 2. Butler G. Fungal sex and pathogenesis. *Clin Microbiol Rev.* janv 2010;23(1):140-59.
- 537 3. Heitman J, Carter DA, Dyer PS, Soll DR. Sexual reproduction of human fungal pathogens. *Cold*  
538 *Spring Harb Perspect Med.* 1 août 2014;4(8).
- 539 4. Bennett RJ, Johnson AD. Completion of a parasexual cycle in *Candida albicans* by induced  
540 chromosome loss in tetraploid strains. *EMBO J.* 15 mai 2003;22(10):2505-15.
- 541 5. O’Gorman CM, Fuller HT, Dyer PS. Discovery of a sexual cycle in the opportunistic fungal  
542 pathogen *Aspergillus fumigatus*. *Nature.* 22 janv 2009;457(7228):471-4.
- 543 6. Hanson SJ, Wolfe KH. An Evolutionary Perspective on Yeast Mating-Type Switching. *Genetics.*  
544 2017;206(1):9-32.
- 545 7. Egel R. Fission yeast mating-type switching: programmed damage and repair. *DNA Repair (Amst).*  
546 2 mai 2005;4(5):525-36.
- 547 8. Maki T, Ogura N, Haber JE, Iwasaki H, Thon G. New insights into donor directionality of mating-  
548 type switching in *Schizosaccharomyces pombe*. *PLoS Genet [Internet].* 31 mai 2018 [cité 17 juill  
549 2018];14(5). Disponible sur: <https://www.ncbi.nlm.nih.gov/pmc/articles/PMC6007933/>
- 550 9. Barsoum E, Martinez P, Aström SU. Alpha3, a transposable element that promotes host sexual  
551 reproduction. *Genes Dev.* 1 janv 2010;24(1):33-44.
- 552 10. Lee C-S, Haber JE. Mating-type Gene Switching in *Saccharomyces cerevisiae*. *Microbiol Spectr.*  
553 avr 2015;3(2):MDNA3-0013-2014.
- 554 11. Haber JE. Mating-type genes and MAT switching in *Saccharomyces cerevisiae*. *Genetics.* mai  
555 2012;191(1):33-64.
- 556 12. Tomimatsu N, Mukherjee B, Harris JL, Boffo FL, Hardebeck MC, Potts PR, et al. DNA-damage-  
557 induced degradation of EXO1 exonuclease limits DNA end resection to ensure accurate DNA  
558 repair. *J Biol Chem.* 30 juin 2017;292(26):10779-90.
- 559 13. White CI, Haber JE. Intermediates of recombination during mating type switching in  
560 *Saccharomyces cerevisiae*. *EMBO J.* mars 1990;9(3):663-73.
- 561 14. Loo S, Rine J. Silencers and domains of generalized repression. *Science.* 17 juin  
562 1994;264(5166):1768-71.
- 563 15. Herskowitz I. Life cycle of the budding yeast *Saccharomyces cerevisiae*. *Microbiol Rev.* déc  
564 1988;52(4):536-53.
- 565 16. Dujon B, Sherman D, Fischer G, Durrens P, Casaregola S, Lafontaine I, et al. Genome evolution in  
566 yeasts. *Nature.* 1 juill 2004;430(6995):35-44.
- 567 17. Muller H, Hennequin C, Gallaud J, Dujon B, Fairhead C. The asexual yeast *Candida glabrata*  
568 maintains distinct a and alpha haploid mating types. *Eukaryotic Cell.* mai 2008;7(5):848-58.

- 569 18. Ramírez-Zavaleta CY, Salas-Delgado GE, De Las Peñas A, Castaño I. Subtelomeric silencing of the  
570 MTL3 locus of *Candida glabrata* requires yKu70, yKu80, and Rif1 proteins. *Eukaryotic Cell*. oct  
571 2010;9(10):1602-11.
- 572 19. Robledo-Márquez K, Gutiérrez-Escobedo G, Yáñez-Carrillo P, Vidal-Aguilar Y, Briones-Martín-Del-  
573 Campo M, Orta-Zavalza E, et al. *Candida glabrata* encodes a longer variant of the mating type  
574 (MAT) alpha2 gene in the mating type-like MTL3 locus, which can form homodimers. *FEMS Yeast*  
575 *Res*. 2016;16(7).
- 576 20. Butler G, Kenny C, Fagan A, Kurischko C, Gaillardin C, Wolfe KH. Evolution of the MAT locus and  
577 its Ho endonuclease in yeast species. *Proc Natl Acad Sci USA*. 10 févr 2004;101(6):1632-7.
- 578 21. Carreté L, Ksiezopolska E, Pegueroles C, Gómez-Molero E, Saus E, Iraola-Guzmán S, et al. Patterns  
579 of Genomic Variation in the Opportunistic Pathogen *Candida glabrata* Suggest the Existence of  
580 Mating and a Secondary Association with Humans. *Curr Biol*. 8 janv 2018;28(1):15-27.e7.
- 581 22. Boissard S, Zhou Li Y, Arnais S, Sequeira G, Raffoux X, Enache-Angoulvant A, et al. Efficient  
582 Mating-Type Switching in *Candida glabrata* Induces Cell Death. *PLoS ONE*.  
583 2015;10(10):e0140990.
- 584 23. Gabaldón T, Martin T, Marcet-Houben M, Durrens P, Bolotin-Fukuhara M, Lespinet O, et al.  
585 Comparative genomics of emerging pathogens in the *Candida glabrata* clade. *BMC Genomics*. 14  
586 sept 2013;14:623.
- 587 24. Fidel PL, Cutright JL, Tait L, Sobel JD. A murine model of *Candida glabrata* vaginitis. *J Infect Dis*.  
588 févr 1996;173(2):425-31.
- 589 25. Cormack BP, Falkow S. Efficient homologous and illegitimate recombination in the opportunistic  
590 yeast pathogen *Candida glabrata*. *Genetics*. mars 1999;151(3):979-87.
- 591 26. Maroc L, Fairhead C. A new inducible CRISPR-Cas9 system useful for genome editing and study of  
592 double-strand break repair in *Candida glabrata*. *Yeast*. 18 août 2019;
- 593 27. Fairhead C, Dujon B. Consequences of unique double-stranded breaks in yeast chromosomes:  
594 death or homozygosity. *Molec Gen Genet*. août 1993;240(2):170-80.
- 595 28. Haber JE. DNA repair: the search for homology. *Bioessays*. mai 2018;40(5):e1700229.
- 596 29. Muller H, Hennequin C, Gallaud J, Dujon B, Fairhead C. The Asexual Yeast *Candida glabrata*  
597 Maintains Distinct  $\alpha$  and  $\alpha$  Haploid Mating Types. *Eukaryotic Cell*. mai 2008;7(5):848-58.
- 598 30. Ramírez-Zavaleta CY, Salas-Delgado GE, De Las Peñas A, Castaño I. Subtelomeric Silencing of the  
599 MTL3 Locus of *Candida glabrata* Requires yKu70, yKu80, and Rif1 Proteins. *Eukaryotic Cell*. oct  
600 2010;9(10):1602-11.
- 601 31. Richard G-F, Kerrest A, Lafontaine I, Dujon B. Comparative genomics of hemiascomycete yeasts:  
602 genes involved in DNA replication, repair, and recombination. *Mol Biol Evol*. avr 2005;22(4):1011  
603 -23.
- 604 32. Xie Z-X, Mitchell LA, Liu H-M, Li B-Z, Liu D, Agmon N, et al. Rapid and Efficient CRISPR/Cas9-Based  
605 Mating-Type Switching of *Saccharomyces cerevisiae*. *G3 (Bethesda)*. 04 2018;8(1):173-83.

- 606 33. Cormack BP, Falkow S. Efficient homologous and illegitimate recombination in the opportunistic  
607 yeast pathogen *Candida glabrata*. *Genetics*. mars 1999;151(3):979-87.
- 608 34. Corrigan MW, Kerwin-Iosue CL, Kuczmarski AS, Amin KB, Wykoff DD. The fate of linear DNA in  
609 *Saccharomyces cerevisiae* and *Candida glabrata*: the role of homologous and non-homologous  
610 end joining. *PLoS ONE*. 2013;8(7):e69628.
- 611 35. Muller H, Hennequin C, Dujon B, Fairhead C. Ascomycetes: the *Candida* MAT Locus: Comparing  
612 MAT in the Genomes of Hemiascomycetous Yeasts. In: Taylor JW, Kronstad JW, Heitman J,  
613 Casselton LA, editors *Sex in Fungi*. 1<sup>re</sup> éd. American Society for Microbiology; 2007. p. 247–263.
- 614 36. Gietz RD, Schiestl RH, Willems AR, Woods RA. Studies on the transformation of intact yeast cells  
615 by the LiAc/SS-DNA/PEG procedure. *Yeast*. 15 avr 1995;11(4):355-60.
- 616 37. Zordan RE, Ren Y, Pan S-J, Rotondo G, De Las Peñas A, Iluore J, et al. Expression plasmids for use  
617 in *Candida glabrata*. *G3 (Bethesda)*. 3 oct 2013;3(10):1675-86.
- 618 38. Nickoloff JA, Chen EY, Heffron F. A 24-base-pair DNA sequence from the MAT locus stimulates  
619 intergenic recombination in yeast. *Proc Natl Acad Sci USA*. oct 1986;83(20):7831-5.
- 620 39. Alani E, Cao L, Kleckner N. A method for gene disruption that allows repeated use of URA3  
621 selection in the construction of multiply disrupted yeast strains. *Genetics*. août 1987;116(4):541-  
622 5.
- 623 40. Beyer HM, Gonschorek P, Samodelov SL, Meier M, Weber W, Zurbriggen MD. AQUA Cloning: A  
624 Versatile and Simple Enzyme-Free Cloning Approach. *PLOS ONE*. 11 sept 2015;10(9):e0137652.
- 625

626 **Figure Captions**

627 **Fig 1. Survival rate of wild-type, *Arad51* mutant and inconvertible strains upon Ho**  
628 **induction.**

629 Blue box represents Ya, red box Yalpha, yellow bar wild-type Ho site and crossed circle  
630 mutated Ho site (**inc** loci) (not to scale). Histogram shows survival rate of strains with  
631 corresponding *MTL* configuration (black, BG87 background and grey, HM100 background).  
632 Results for HM100 and BG87 are from (22). Values from, at least, four experiments were  
633 averaged, the SEM used as estimate of the error, and the p-value was calculated using the  
634 Wilcoxon test. \*\*\*: P-value<0.001.

635

636 **Fig 2. Survival rate during Ho (A) or Cas9 (B) induction associated to the percentage of**  
637 **switched colonies.**

638 Induction was performed in liquid during a time-course experiment for strain HM100  
639 expressing Ho (harboring p7.1) (A) or expressing Cas9 targeting *MATa* (harboring pCGLM1-  
640 Ya2) (B). The Y-axis represents both the survival rate (curve) expressed as a percentage, and  
641 the percentage of switched colonies (histogram). Survival rate is calculated by comparing the  
642 number of colony-forming units on SC-Rep with the number of cells plated, as estimated by  
643 counting; and is normalized by dividing it by the survival rate of the control strain, i.e. the strain  
644 transformed by pCGLM1 for Cas9 induction and the strain transformed by pYR32 for Ho  
645 induction, grown in the same conditions. For survival rate, values from four experiments were  
646 averaged and the SEM is used as estimate of the error. For the percentage of switched colonies,  
647 the square root of the number of surviving colonies screened is used, i.e. sqrt of 36. For time-  
648 course experiments, at points T=19 hrs in (A) and T=17 and T=21 hrs in (B), no surviving  
649 colonies screen was performed.

650

651 **Figure 3. Survival rate upon Ho and Cas9 induction and gRNA used for Cas9.**

652 (A) Survival rate of strains SL-CG8 and SL-CG9 upon Ho (in blue) and Cas9 (in grey)-induced  
653 DSB at *MAT*. The Y-axis follows a square root scale. Induction is performed on solid medium.  
654 Values from four experiments were averaged, the SEM used as estimate of the error, and the P-  
655 value was calculated using the Wilcoxon test. \*\*\*: P-value<0.001. (B) The gRNA targeting the  
656 *MATa* locus of *C. glabrata*. Sequence shown is a segment of the *MATa* locus of HM100,  
657 including the gRNA in bold and the PAM sequence in red. Plain double arrow indicates the Ho  
658 cleavage site and dashed double arrow the Cas9 cleavage site.

659

660 **Supporting information captions**

661 **S1 Appendix. Mating-type screened at *MAT* in different strains**

662 All strains are analyzed with primer pairs that are specific to *MATa*, *MATalpha*, *MATa-inc* and  
663 *MATalpha-inc*, respectively GS01/123, GS01/121, GS01/122 and GS01/120. Top left panel:  
664 amplification obtained on BG87 (*MATa*); bottom left panel: amplification obtained on YL05  
665 (*MATa-inc*); top right panel: amplification obtained on HM100 (*MATalpha*); bottom right  
666 panel: amplification obtained on YL07 (*MATalpha-inc*). MM: Molecular Marker, GeneRuler 1  
667 kb (Thermo Fisher Scientific Inc).

668

669 **S2 Appendix. Comparison of wild-type and mutated Ho site of locus carrying Yalpha (A)**  
670 **or Ya information (B).**

671 The wild-type Ho site is shown on top in blue letters, the mutated Ho site is shown below with  
672 mutated bp in red and deleted bp as dashes. Arrows indicate the Ho cleavage site.

673

674 **S3 Appendix. Molecular characterization of knock-out HM100 *Arad51* mutants by**  
675 **Southern blot hybridization.**

676 Two restriction enzyme digestions have been performed to confirm the correct deletion of  
677 *RAD51* in strain HM100: one with *HindIII* (left) and one with *NdeI/EcoRI* (right). In both cases,  
678 the same probe has been used, corresponding to 500 bp homologous to the 5' UTR fused to 500  
679 bp homologous to the 3' UTR.

680

681 **S1 Table.** Plasmids used in this work.

682

683 **S2 Table.** Primers used in this work.

684 Fw: Forward; Rv: Reverse. The lowercase letters represent sequence with no homology to  
685 template DNA, whereas homologous regions are indicated in uppercase.

686

687 **S3 Table.** Methods used for strains construction.

688

689



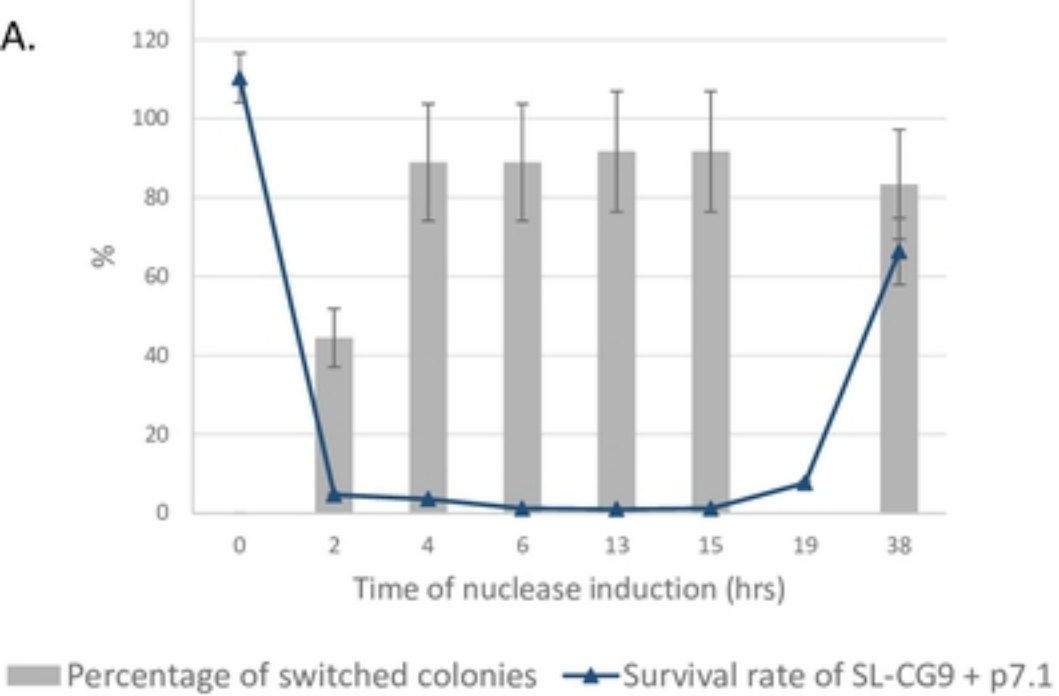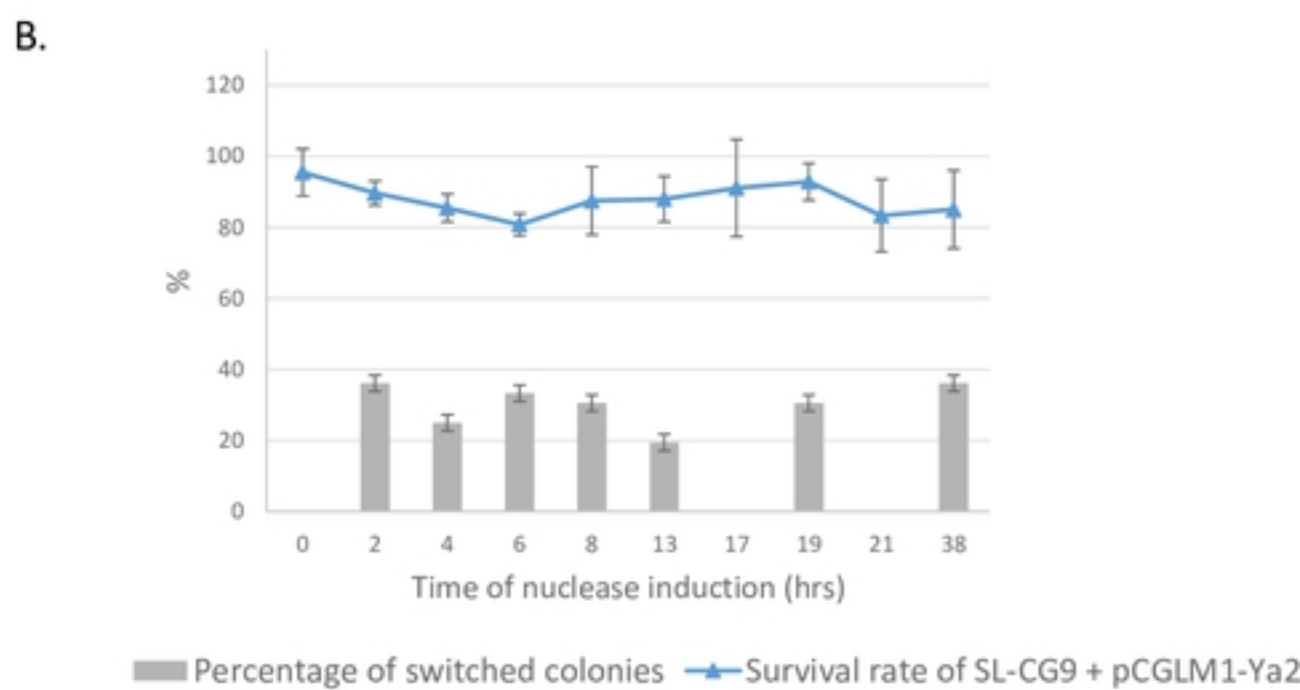

**Figure 2**

A.

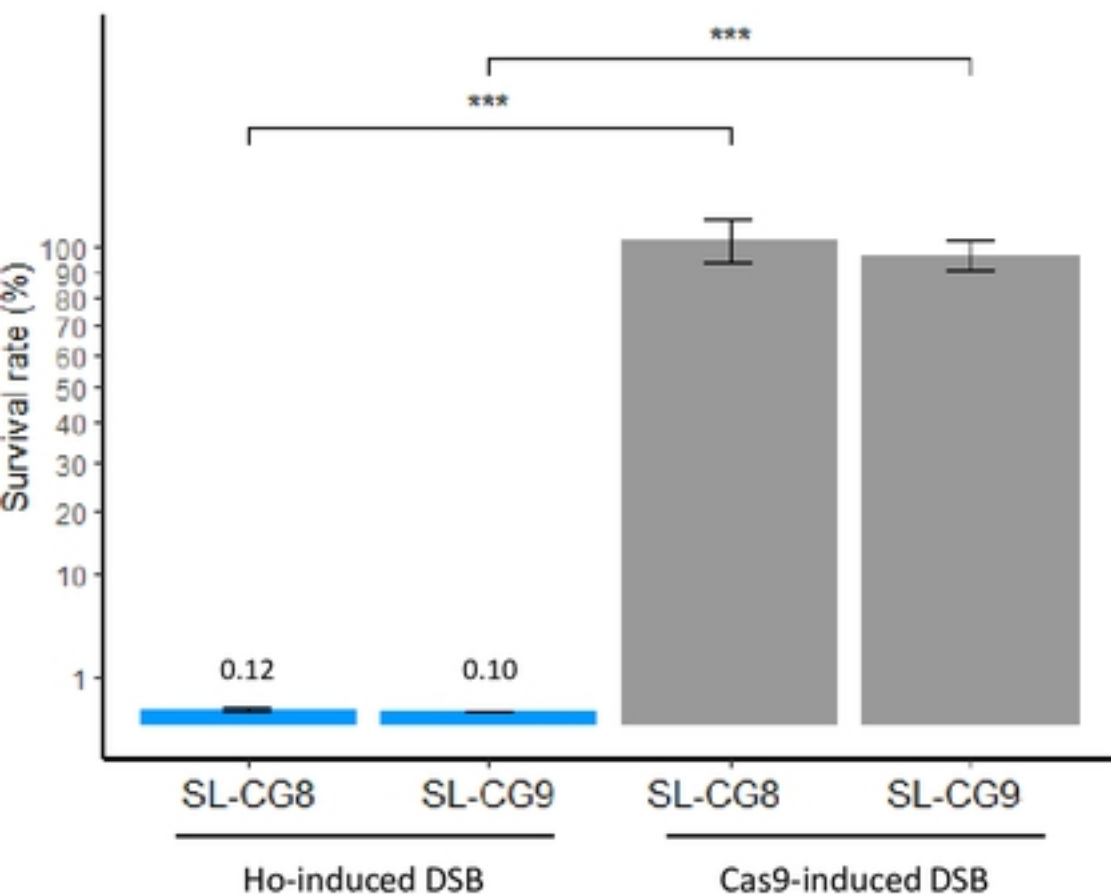

B.

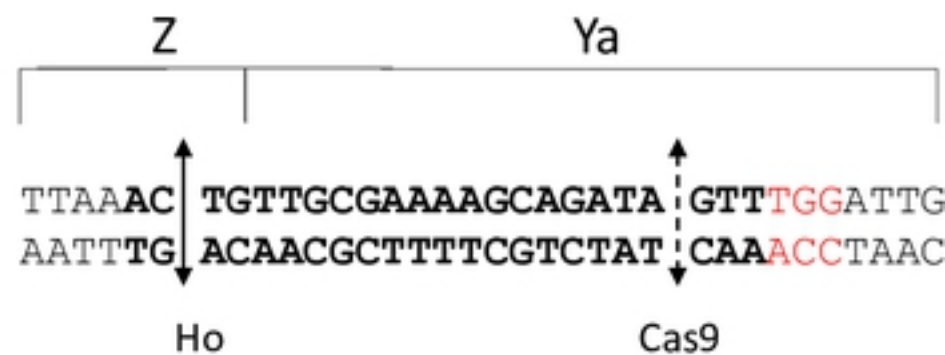

Figure 3

MAT undergoes Ho cut

MAT is protected from Ho cut

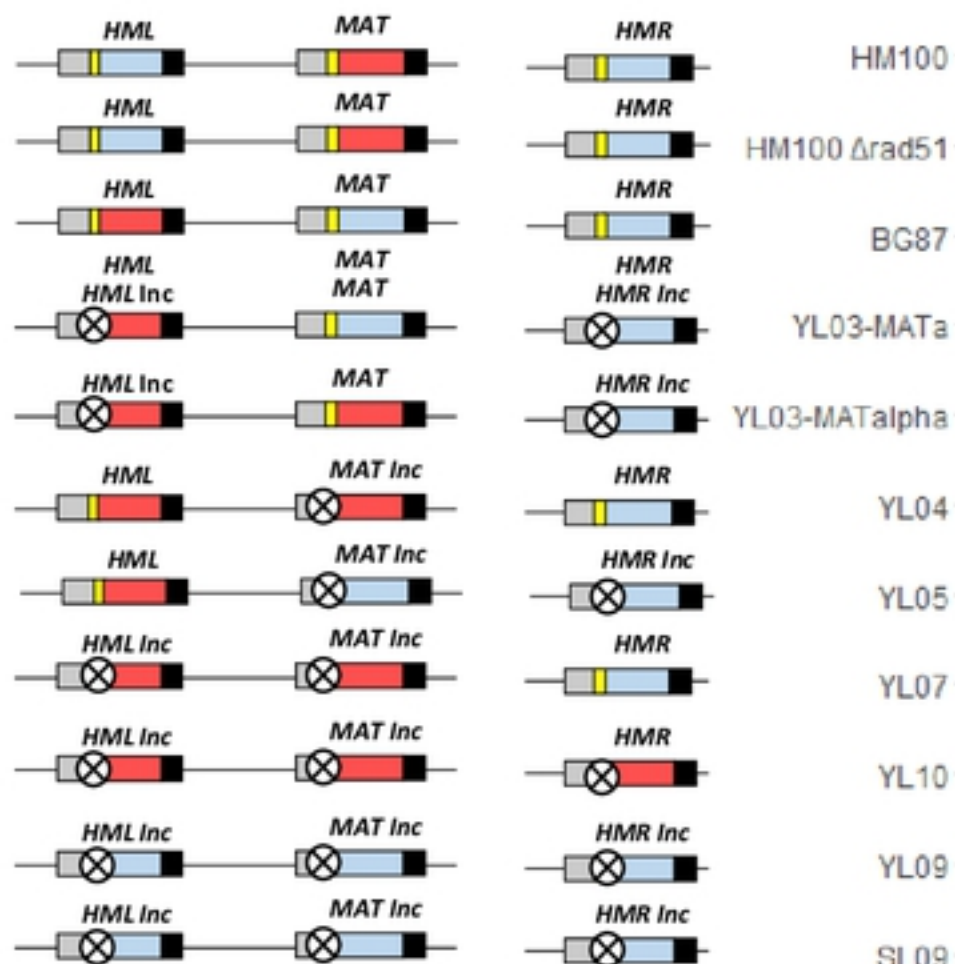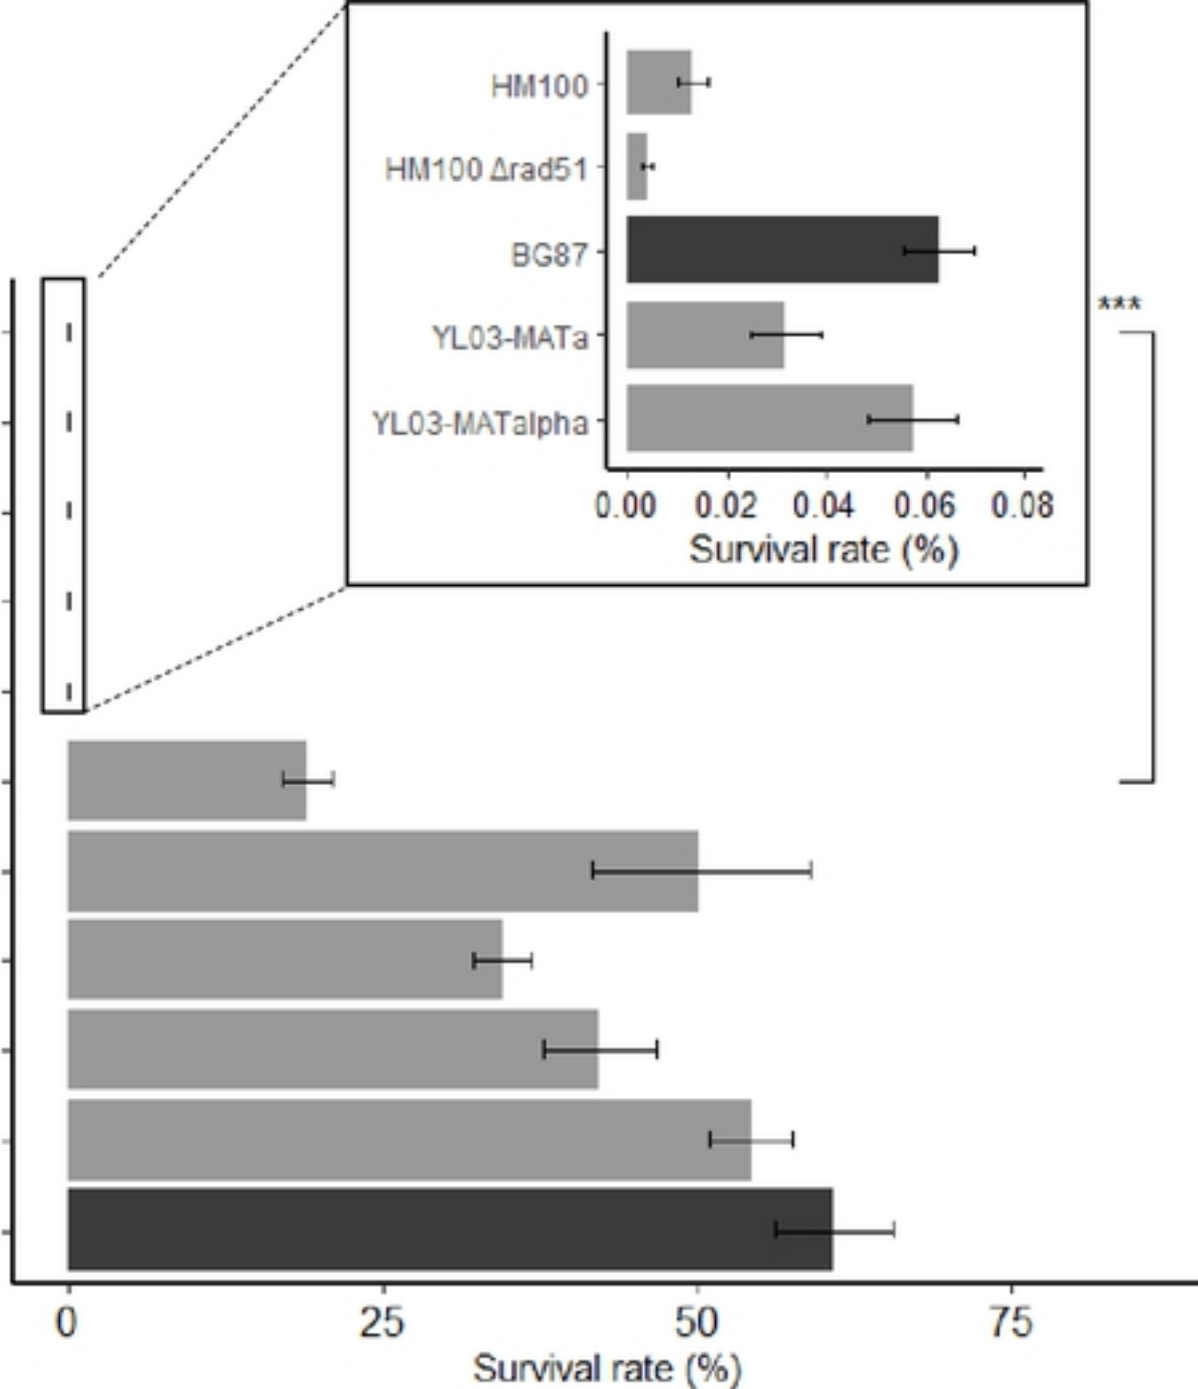

Figure 1
